# Supplementary material for: Enhanced sensitivity in self-powered Dion–Jacobson perovskite X-ray detectors via a ternary-solvent-ink approach
Source: Royal Society of Chemistry journal article supplement (doi:10.1039/d4tc02973a), 2024-01-01
Supplement: d4tc02973a1.pdf [file d4tc02973a1.pdf]

Supporting Information

**Enhanced Sensitivity in Self-Powered Dion-Jacobson Perovskite X-ray  
Detectors via a Ternary-Solvent-Ink Approach**

Liting Tao<sup>1</sup>, Li Ding<sup>1</sup>, Yuyang Li<sup>1</sup>, Hui Liu<sup>1</sup>, Meiping Gao<sup>3</sup>, Deren Yang<sup>1,3</sup>, and Yanjun Fang<sup>1,2,3\*</sup>

*<sup>1</sup>State Key Laboratory of Silicon and Advanced Semiconductor Materials, School of Materials Science and Engineering, Zhejiang University, Hangzhou 310027, P. R. China*

*<sup>2</sup>Shanxi-Zheda Institute of Advanced Materials and Chemical Engineering, Taiyuan 030024, P. R. China*

*<sup>3</sup>Shangyu Institute of Semiconductor Materials, Shaoxing 312300, P. R. China*

---

\* E-mail: [jkfang@zju.edu.cn](mailto:jkfang@zju.edu.cn)

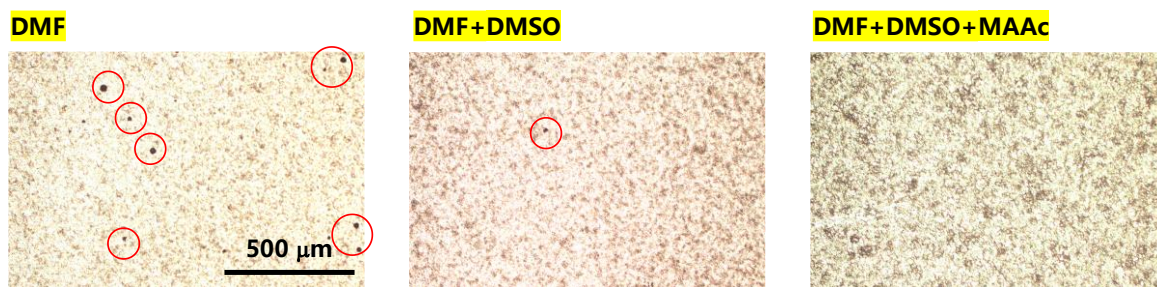

Figure S1. Optical microscope images of quasi-2D DJ perovskite films made by with single, binary, and ternary solvents.

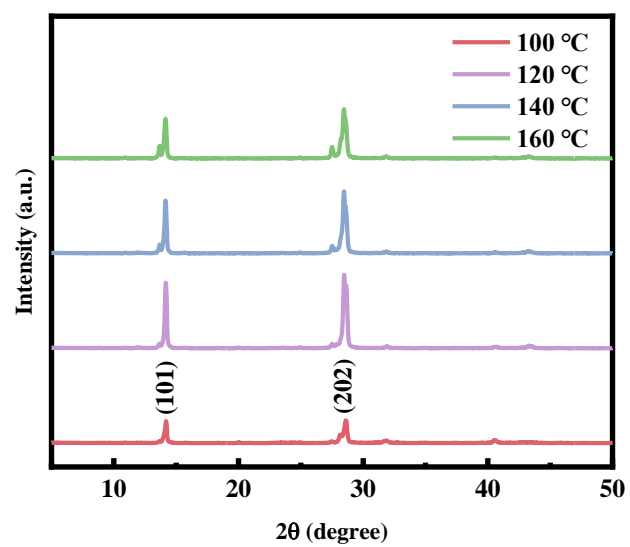

Figure S2. The XRD pattern of quasi-2D films made by ternary solvent ink strategy under different processing temperatures.

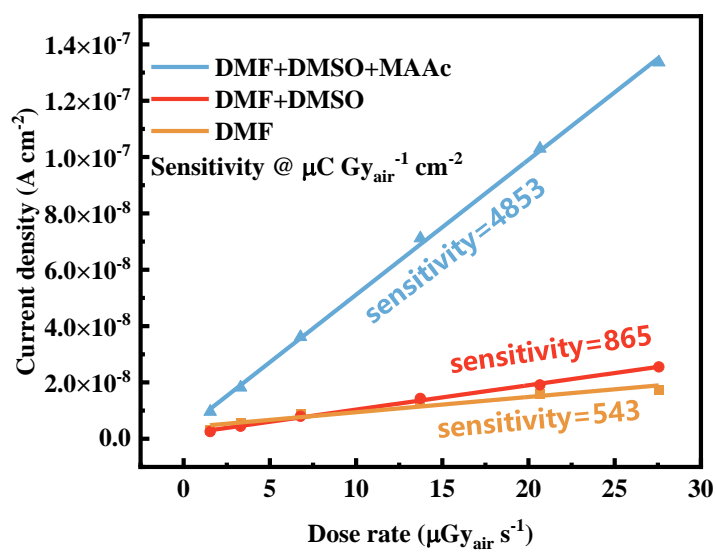

Figure S3. The sensitivity derived by linear fitting the dose rate dependent photocurrent of quasi-2D devices made by single, binary and ternary solvents .

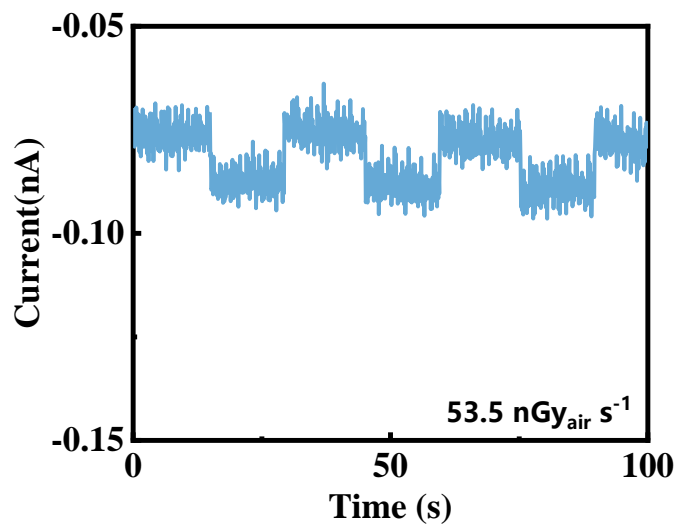

Figure S4. The photocurrent response of the target devices under on/ off X-ray illumination with the dose rate of  $53.5 \text{ nGy}_{\text{air}} \text{ s}^{-1}$ .

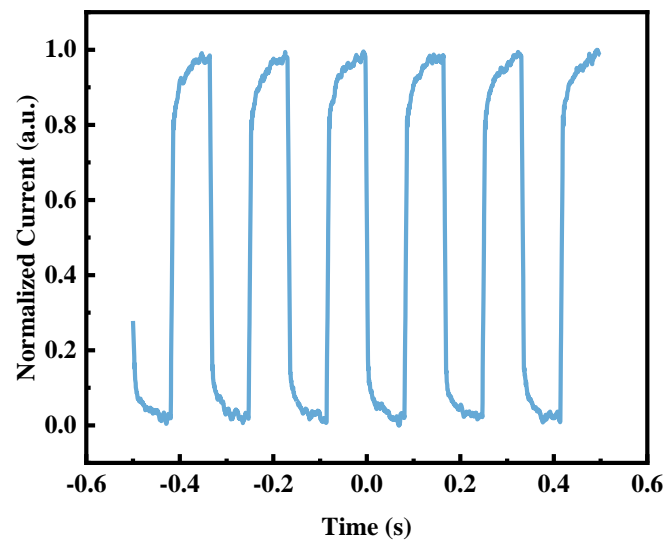

Figure S5. Temporal response of the 7  $\mu\text{m}$  thick devices at 0 V bias under 532 nm LED illumination with a modulation frequency of 6 Hz.

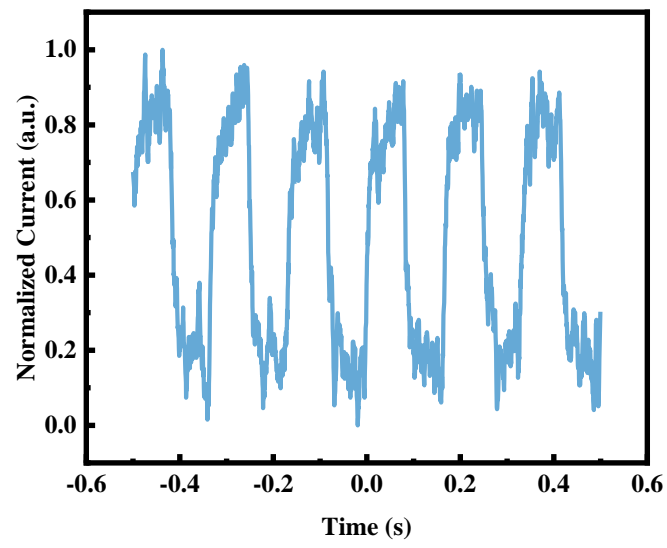

Figure S6. Temporal response of the 16  $\mu\text{m}$  thick devices at 0 V bias under 532 nm LED illumination with a modulation frequency of 6 Hz.

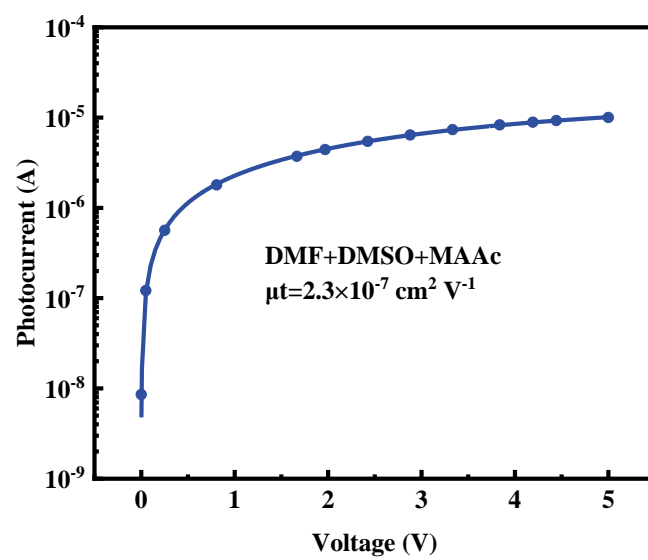

Figure S7. Voltage-dependent photocurrent curve of devices made by ternary solvents for the derivation of  $\mu\tau$  product.



Table S1 Comparison of the device performance of different 2D perovskite X-ray detectors

| Materials                                                                                        | Detection Limit<br>(nGy <sub>air</sub> s <sup>-1</sup> ) | Sensitivity<br>(μC Gy <sub>air</sub> <sup>-1</sup> cm <sup>-2</sup> ) | Working bias<br>(V) |
|--------------------------------------------------------------------------------------------------|----------------------------------------------------------|-----------------------------------------------------------------------|---------------------|
| Cs <sub>2</sub> Pb(SCN) <sub>2</sub> Br <sub>2</sub> film <sup>1</sup>                           | 42.4                                                     | 216.3                                                                 | 40                  |
| (S-BPEA) <sub>2</sub> FAPb <sub>2</sub> I <sub>7</sub> SC <sup>2</sup>                           | 161                                                      | 87.8                                                                  | Self-driven         |
| (4AMPY)(MA) <sub>3</sub> Pb <sub>4</sub> I <sub>13</sub> /MAPbBr <sub>3</sub><br>SC <sup>3</sup> | 77                                                       | 1850                                                                  | Self-driven         |
| PEA <sub>2</sub> MA <sub>4</sub> Pb <sub>5</sub> I <sub>16</sub> film <sup>4</sup>               | 22.7                                                     | 236                                                                   | 30                  |
| CsPb <sub>2</sub> Br <sub>5</sub> SC <sup>5</sup>                                                | 12.7                                                     | 8865.6                                                                | 50                  |
| EPZPbBr <sub>4</sub> SC <sup>6</sup>                                                             | <5.43                                                    | 1240                                                                  | 10                  |
| (R/S-PPA)(IEA)PbBr <sub>4</sub> SC <sup>7</sup>                                                  | 3                                                        | 48.4                                                                  | Self-driven         |
| This work 7 μm                                                                                   | 39                                                       | 4853                                                                  | Self-driven         |
| This work 16 μm                                                                                  | 27                                                       | 8205                                                                  | Self-driven         |

## Reference

- 1 D. Liu, H. Di, J. Ren, W. Jiang, H. Li, C. Zhao, D. Xin, Z. Xing, X. Zheng and Y. Zhao, *Small*, 2023, **19**, 2304201.
- 2 Q. Guan, H. Ye, S. You, Z.-K. Zhu, H. Li, X. Liu and J. Luo, *Small*, 2024, **20**, 2307908.
- 3 X. Zhang, X. Song, M. Abulikemu, B. Shao, S. Chen, L. Gutiérrez-Arzaluz, G. Si, T. Ahmad, W. Wu, O. F. Mohammed and O. M. Bakr, *Adv. Funct. Mater.*, 2024, **34**, 2312871.
- 4 H. Chen, Z. Zhu, B. Zhao, W. Huang, G. Qu, Z.-X. Xu, X.-F. Yu, Q. Xiao, S. Yang and Y. Li, *Adv. Sci.*, 2024, **11**, 2309185.
- 5 X. Feng, L. Zhang, B. Zhang, J. You, K. Li, H. Zeng, X. Wang, Z. Dai, S. Jia, H. Bao, S. Wang and S. Liu, *Adv. Funct. Mater.*, 2024, **n/a**, 2402166.
- 6 M. Xia, X. Sun, F. Ye, M. Liao, J. Liu, S. Liu, D. Wu, Y. Xu, X. Zhang, K.-H. Xue, X. Miao, J. Tang and G. Niu, *Adv. Mater.*, 2024, **36**, 2313663.
- 7 Z.-K. Zhu, J. Wu, P. Yu, Y. Zeng, R. Li, Q. Guan, H. Dai, G. Chen, H. Yang, X. Liu, L. Li, C. Ji and J. Luo, **n/a**, 2409857.
